# Supplementary material
Source: PubMed Central journal article supplement (PMC6391115)
Supplement: jci-129-124159-s257.pdf [file jci-129-124159-s257.pdf]

## Supplemental data

### **Aberrant DEGS1 sphingolipid metabolism impairs nervous system function in humans**

Gergely Karsai<sup>1,2\*</sup>, Florian Kraft<sup>3\*</sup>, Natja Haag<sup>3\*</sup>, G Christoph Korenke<sup>4</sup>, Benjamin Hänisch<sup>3</sup>, Alaa Othman<sup>1,2</sup>, Saranya Suriyanarayanan<sup>1,2</sup>, Regula Steiner<sup>1,2</sup>, Cordula Knopp<sup>3</sup>, Michael Mull<sup>5</sup>, Markus Bergmann<sup>6</sup>, J Michael Schröder<sup>7</sup>, Joachim Weis<sup>7</sup>, Miriam Elbracht<sup>3</sup>, Matthias Begemann<sup>3</sup>, Thorsten Hornemann<sup>1,2#</sup> and Ingo Kurth<sup>3#</sup>

\*,# These authors contributed equally to this work.

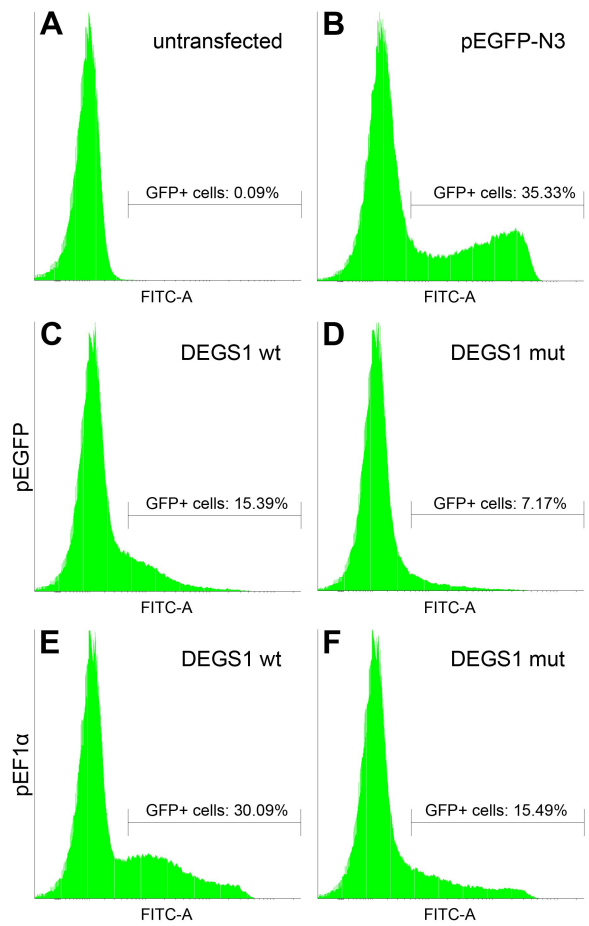

**Supplemental Figure 1:** FACS analysis of HAP1 cells (untransfected cells in **(A)** transfected with either, **(B)** pEGFP-N3, **(C)** wt DEGS1-pEGFP, **(D)** mut DEGS1-pEGFP and **(E)** pEF1 $\alpha$ - wt DEGS1-EGFP or **(F)** pEF1 $\alpha$ - mut DEGS1-EGFP.

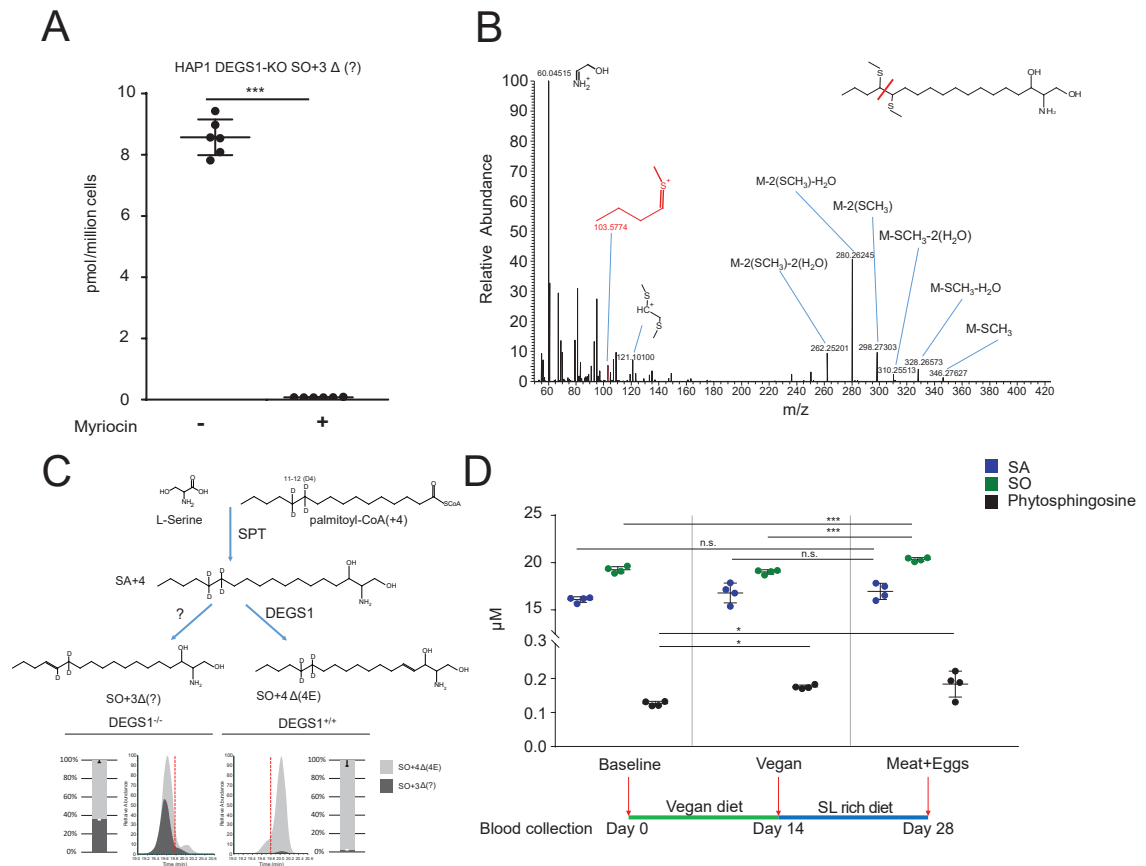

**Supplemental Figure 2: (A)** Quantification of the SO+3  $\Delta$  (?) peak in HAP1 DEGS1<sup>-/-</sup> cells cultured in presence or absence of Myriocin. Error bars indicate mean  $\pm$  SD. **(B)** Structural analysis of native, unlabeled SO  $\Delta$  (?) after chemical derivatization with dimethyl disulfide followed by collision induced HCD fragmentation. The fragment (m/z 103.5774) confirmed a  $\Delta$ 14 DB position of the SO isomer. **(C)** Supplementation of HAP1 WT<sup>+/+</sup> and DEGS1<sup>-/-</sup> cells with d4 (C<sub>11</sub>-C<sub>12</sub>) labelled palmitate. HAP1 WT cells produce exclusively the canonical SO+4 while the isomeric SO  $\Delta$ 14Z was found to be SO+3 labelled. Error bars indicate SD. **(D)** Change in total plasma SA, SO and phytosphingosines (phytoSO) levels after the supplementation with either a vegan (green) or a SL rich diet (blue). Error bars indicate the mean  $\pm$  SD. \*P < 0.05, \*\*P < 0.01, and \*\*\*P < 0.001 (one way ANOVA and Tukey's correction for multiple testing).

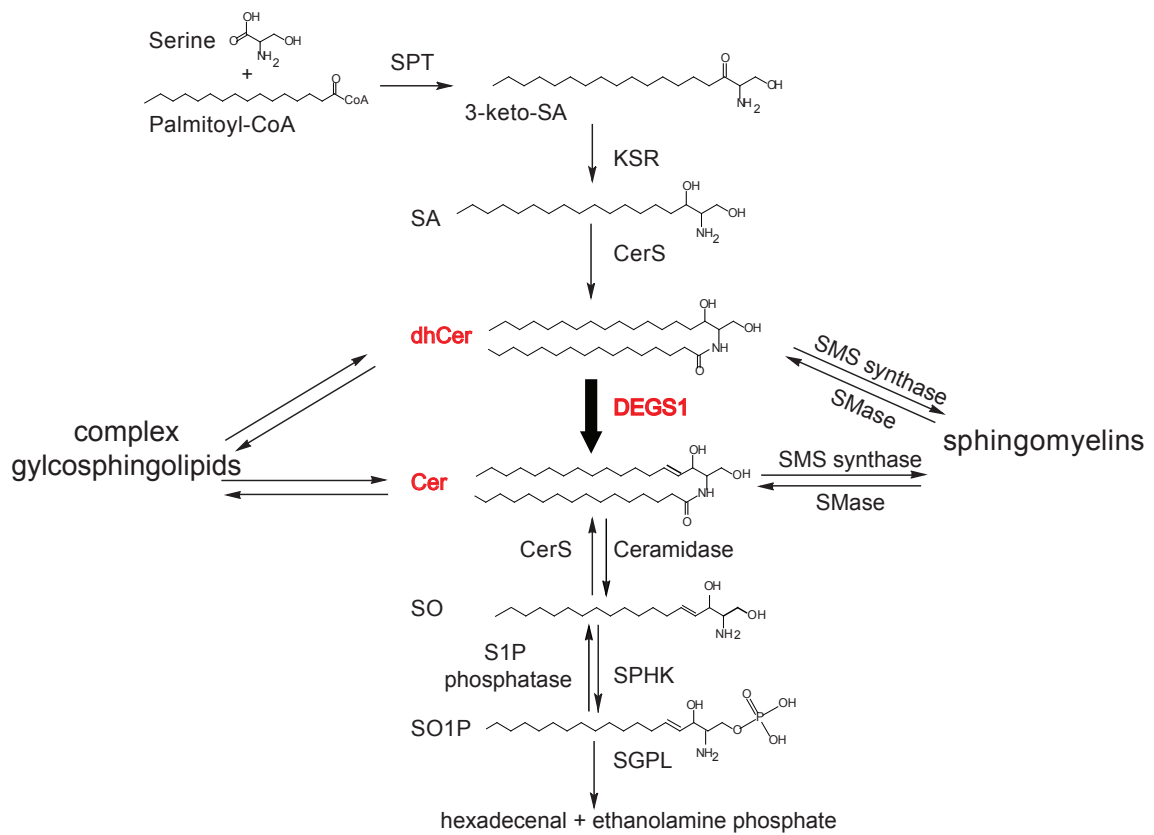

**Supplemental Figure 3:** Overview of the sphingolipid de-novo synthesis pathway. DEGS1 catalyzes the conversion of dhCer to Cer by the introduction of a  $\Delta^4E$  double bond. Complex sphingolipids (e.g sphingomyelins) can be formed from dhCer and Cer.

**Supplemental Table 1:** Whole exome sequencing data from five family members.

**Supplemental Video:** Index patient at age 22.

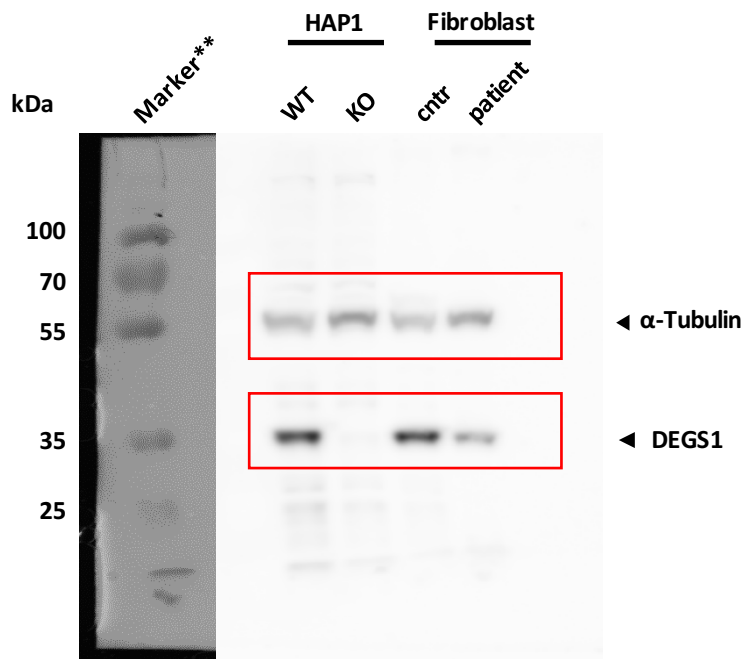

\*\* PageRuler Prestained Plus

Full unedited gel for Figure 2F

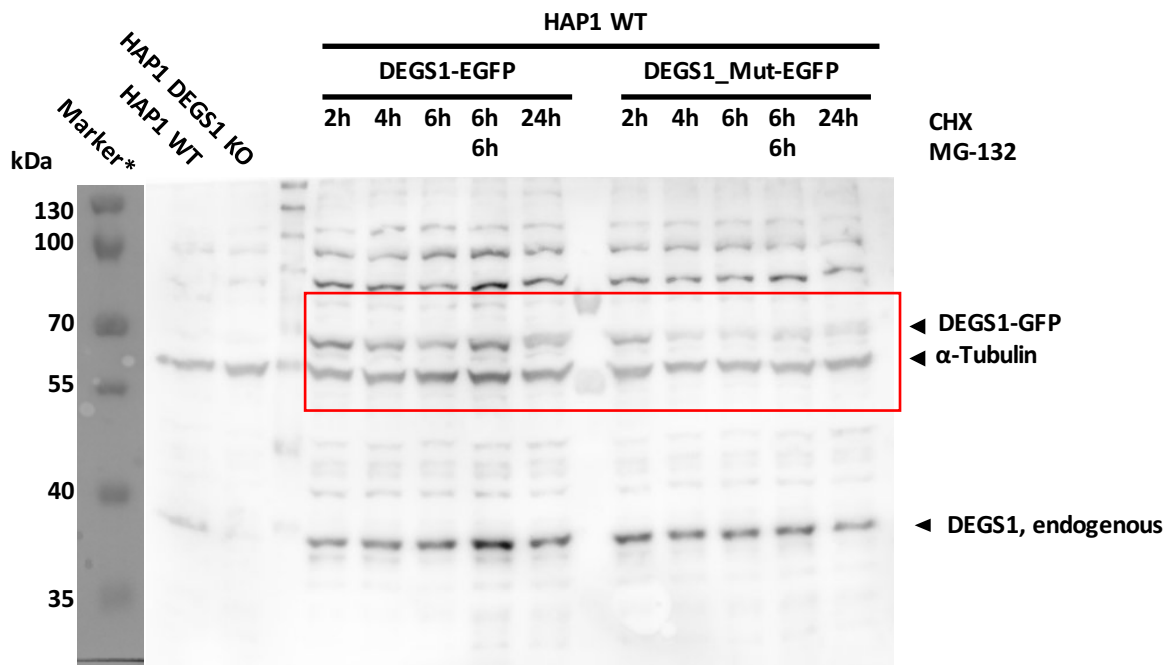

\*PageRuler Prestained

Full unedited gel for Figure 2H
